# Supplementary material
Source: PubMed Central journal article supplement (PMC6076225)

Fig 1f

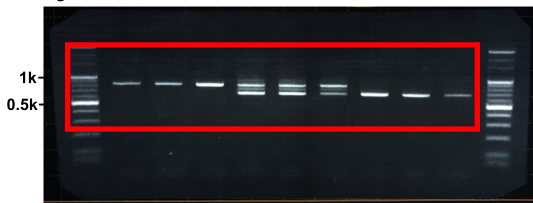

Figure 1i

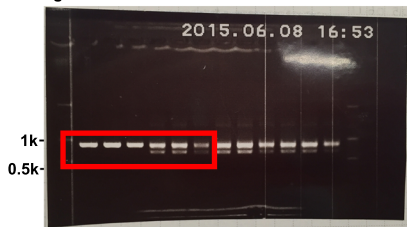

Ext Data Fig 2e

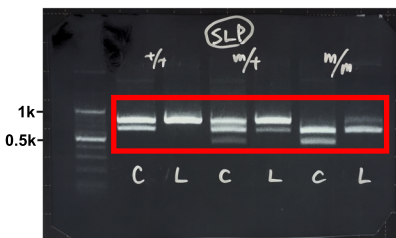

Figure 1h

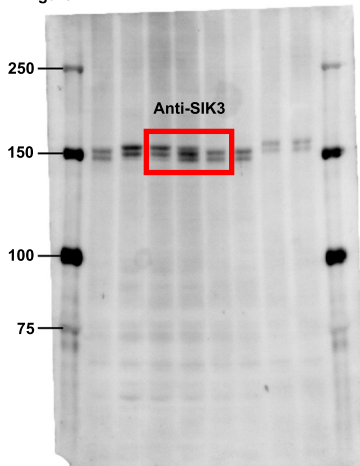

Extra Data Fig 3b

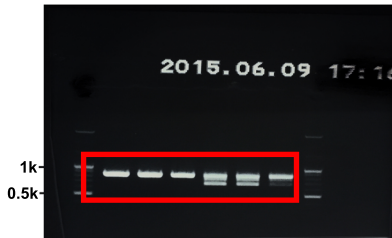

Ext Data Fig 6b

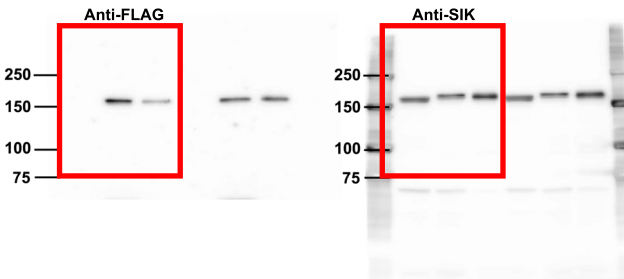

Ext Data Fig 6c

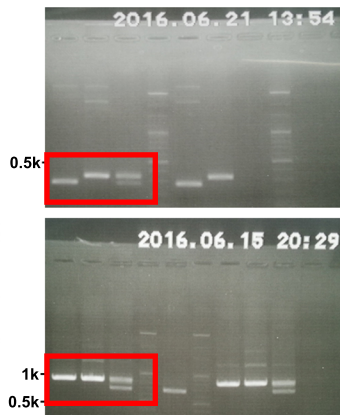

Supplement: NIHMS982598-supplement-Supplementa_file.pdf [file NIHMS982598-supplement-Supplementa_file.pdf]
